# Supplementary material for: Mapping the stereotyped behaviour of freely moving fruit flies
Source: PubMed Central journal article supplement (PMC4233753; doi:10.1098/rsif.2014.0672), 2014-10-06
Supplement: rsif20140672supp1.pdf [file rsif20140672supp1.pdf]

# Mapping the stereotyped behaviour of freely-behaving fruit flies: Supplementary Materials

Gordon J. Berman,<sup>1</sup> Daniel M. Choi,<sup>2</sup> William Bialek,<sup>1</sup> and Joshua W. Shaevitz<sup>1</sup>

<sup>1</sup>*Joseph Henry Laboratories of Physics and Lewis-Sigler Institute for Integrative Genomics*

<sup>2</sup>*Department of Molecular Biology*

*Princeton University*

*Princeton, NJ 08544*

TABLE S1. Parameters used in eigen-decomposition

| Parameter  | Description                                                         | Value |
|------------|---------------------------------------------------------------------|-------|
| $N_\theta$ | Number of angles used in Radon transforms                           | 90    |
| $M$        | Number of postural eigenmodes (found, not defined <i>a priori</i> ) | 50    |

TABLE S2. Parameters used in wavelet analysis

| Parameter  | Description                              | Value |
|------------|------------------------------------------|-------|
| $N_f$      | Number of frequency channels             | 25    |
| $\omega_0$ | Non-dimensional Morlet wavelet parameter | 5     |
| $f_{min}$  | High-pass frequency cut-off              | 1 Hz  |
| $f_{max}$  | Low-pass frequency cut-off               | 50 Hz |

TABLE S3. Parameters used in t-SNE implementation

| Parameter       | Description                                    | Value  |
|-----------------|------------------------------------------------|--------|
| $H$             | Transition entropy                             | 5      |
| $N_{train}$     | Training set size                              | 35,000 |
| $N_{neighbors}$ | Maximum non-zero re-embedding transitions      | 200    |
| $N_{embed}$     | Nearest neighbors for training set calculation | 10     |

TABLE S4. Parameters used in behavioural segmentation

| Parameter     | Description                                                    | Value      |
|---------------|----------------------------------------------------------------|------------|
| $\sigma$      | Width of gaussian kernel density estimator for embedded points | 1.5        |
| $\tau_{min}$  | Minimum behavioural time scale                                 | .05 s      |
| $\sigma_v$    | Width of gaussian for embedded-space velocity calculations     | .02 s      |
| $\sigma_{vM}$ | Standard deviation of von Mises smoothing for phase averaging  | .1 radians |

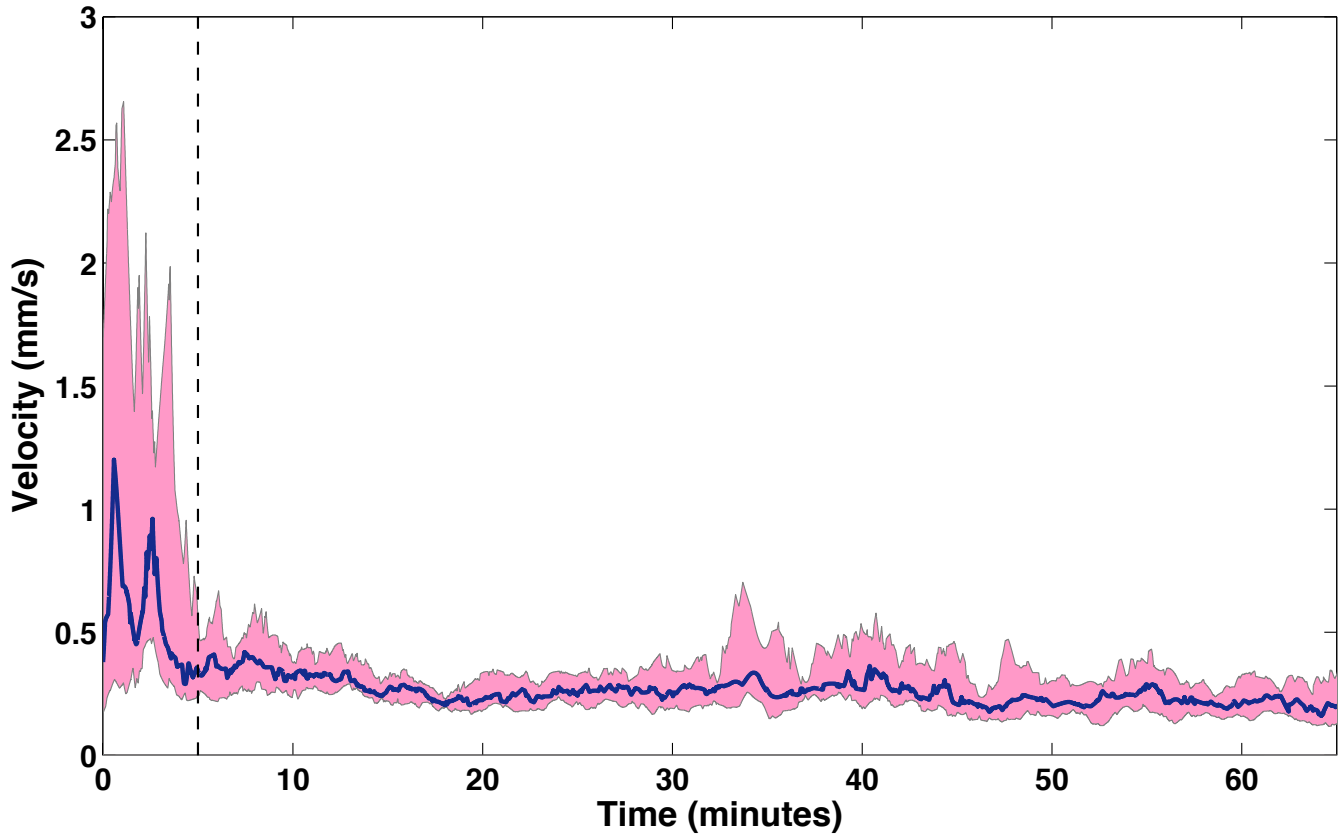

FIG. S1. Flies adapt to the arena in about five minutes. Median movement velocity for male flies ( $N = 59$ ) during the 65 minute filming period. Pink regions represent the 25% and 75% quantiles at each point in time. Note that almost all adaptation occurs within the first five minutes placed in the dish. This region is excluded from our analyses

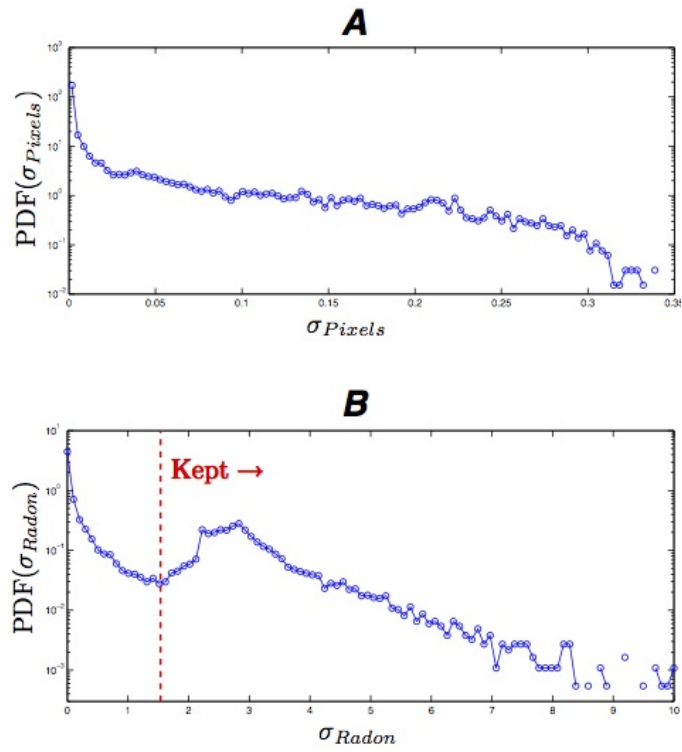

FIG. S2. Radon vs. pixel representation of images. A) Probability density function of pixel standard deviations. B) Probability density function of Radon pixel standard deviations. Note the clear minimum that exists in B), allowing for an effective reduction in the number of pixels necessary to represent the data.

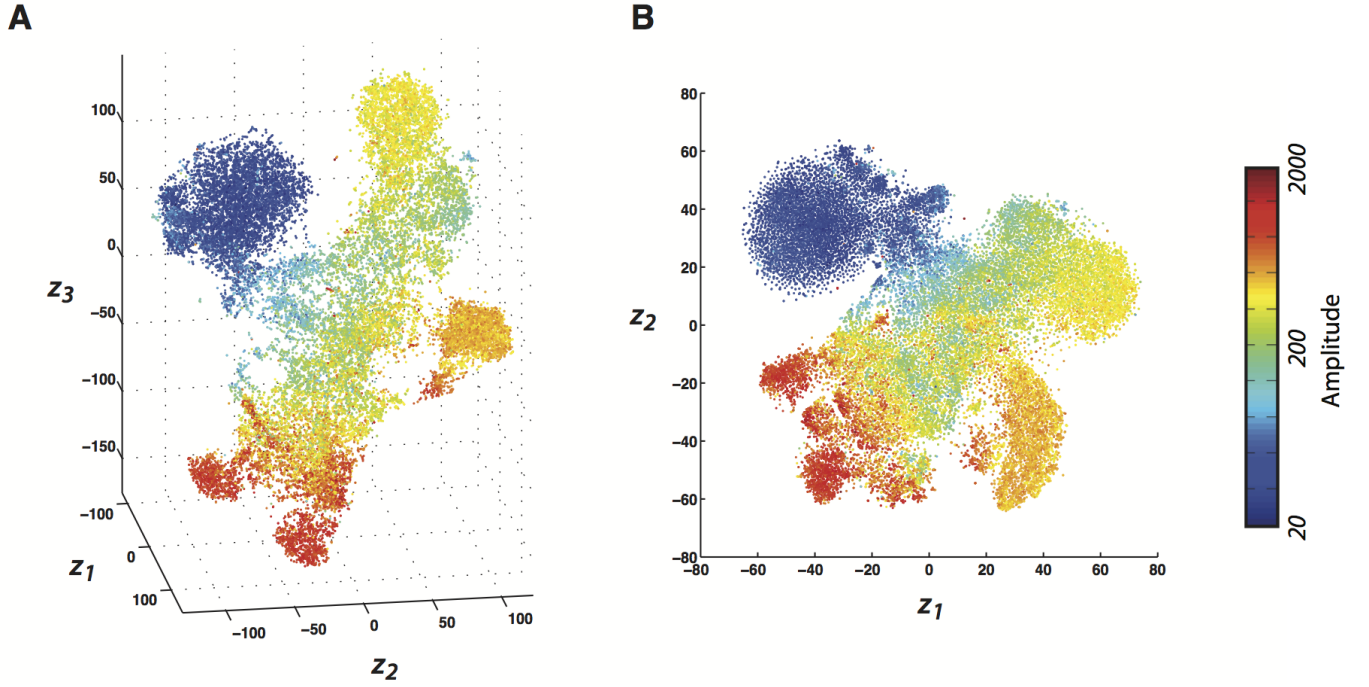

FIG. S3. Comparison between embedding into 3-D (A) versus 2-D (B) via t-SNE. Other than the embedding dimension, all other parameters remain constant. Color labels are proportional to the logarithm of the normalizing amplitude ( $\sum_{k,f} S(k, f; t)$ ) for each point in the training set. There is a 2% improvement in the error function (Equation D1) in the 3-D case as compared to the 2-D embedding (2.9 versus 3.3 bits out of a total of 20.6 bits for the transition matrix  $P$ ).

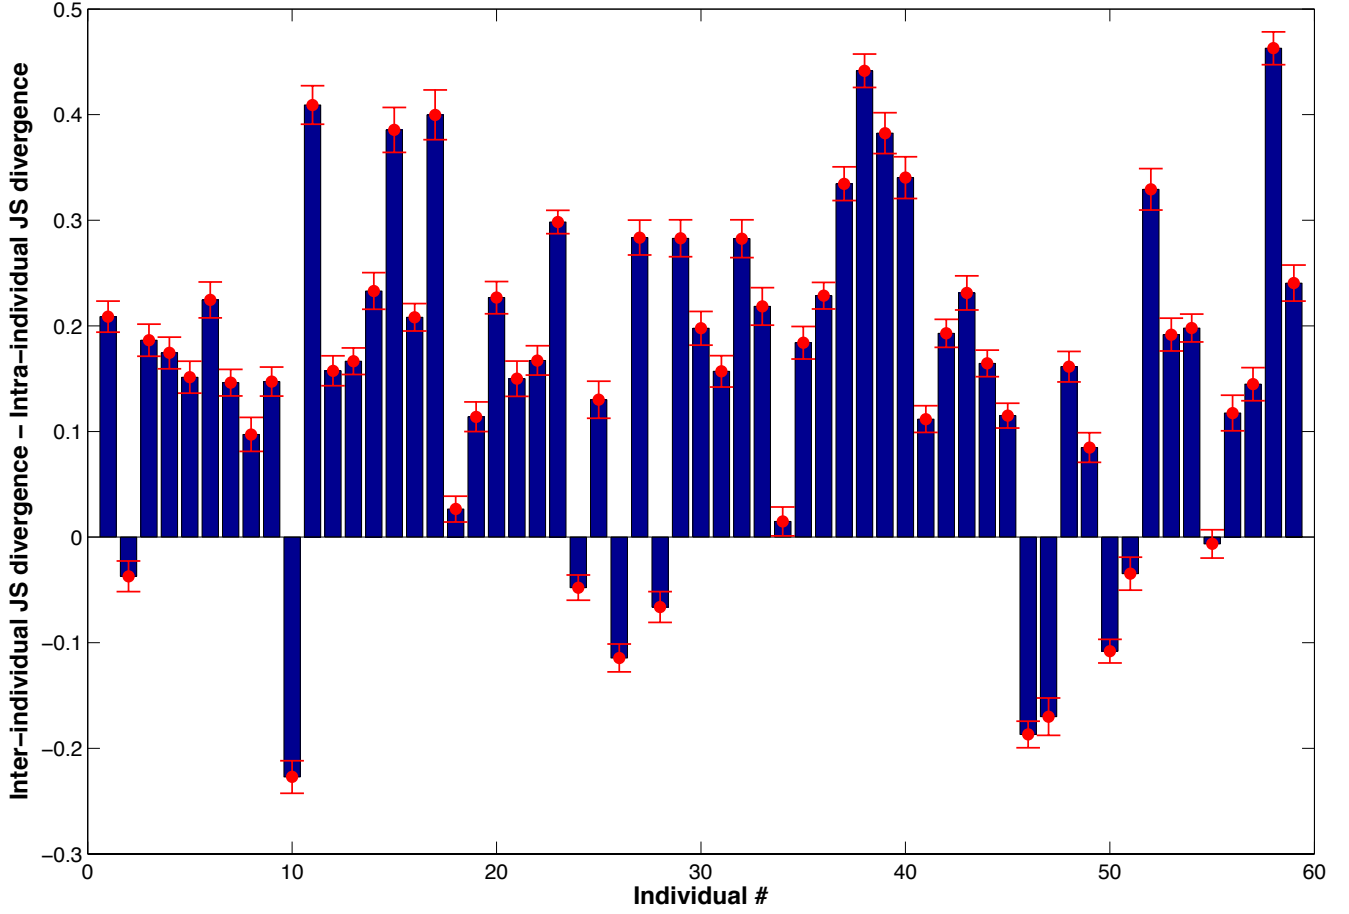

FIG. S4. Inter- versus intra- individual variation. Plotted is the inter-individual variation minus the intra-individual variation for each of the 59 male flies. Here, we measure the difference between two behavioural spaces as the Jensen-Shannon (JS) divergence between their respective probability densities. Intra-individual variation is measured as the JS divergence between maps generated from the first 20 minutes and the last 20 minutes of an individual data set. Inter-individual variation is measured as the median JS divergence between the behavioural space between individuals. Error bars are calculated via N-1 bootstrapping on the inter-individual variance. Accordingly, a positive value on this plot implies that the two portions of the data set are more similar to each other than they are to other individuals' behavioural spaces. We find that 48 of the 59 individuals display significantly less intra- than inter-individual variations ( $\mu = .16 \pm .02$ ).

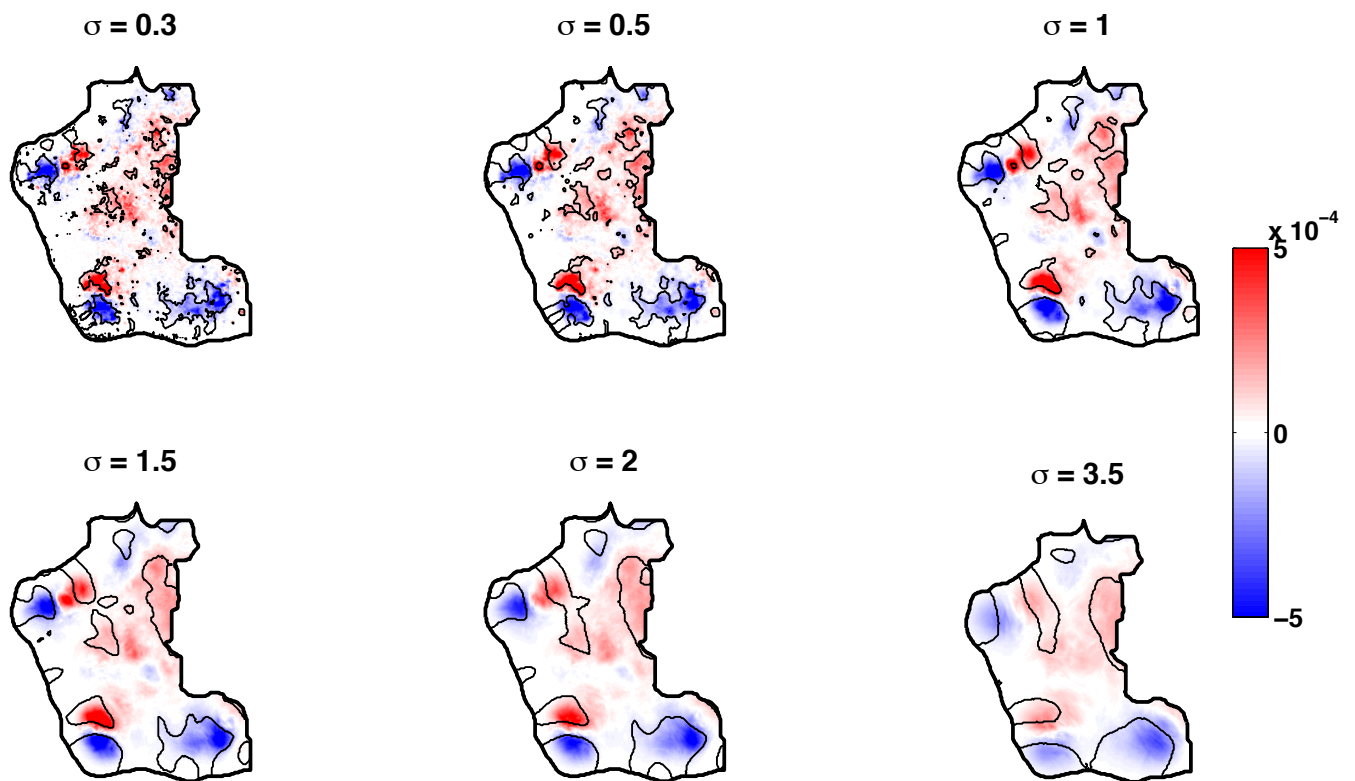

FIG. S5. Effect of varying the smoothing parameter,  $\sigma$ , on the identified male/female wing movement distinctions. Plots are of the difference between the median female region-normalized probability density function and the median male region-normalized probability density function for various values of  $\sigma$ . Lines within the regions encircle regions where the  $p$ -Value of the Wilcoxon rank sum test are less than .01.

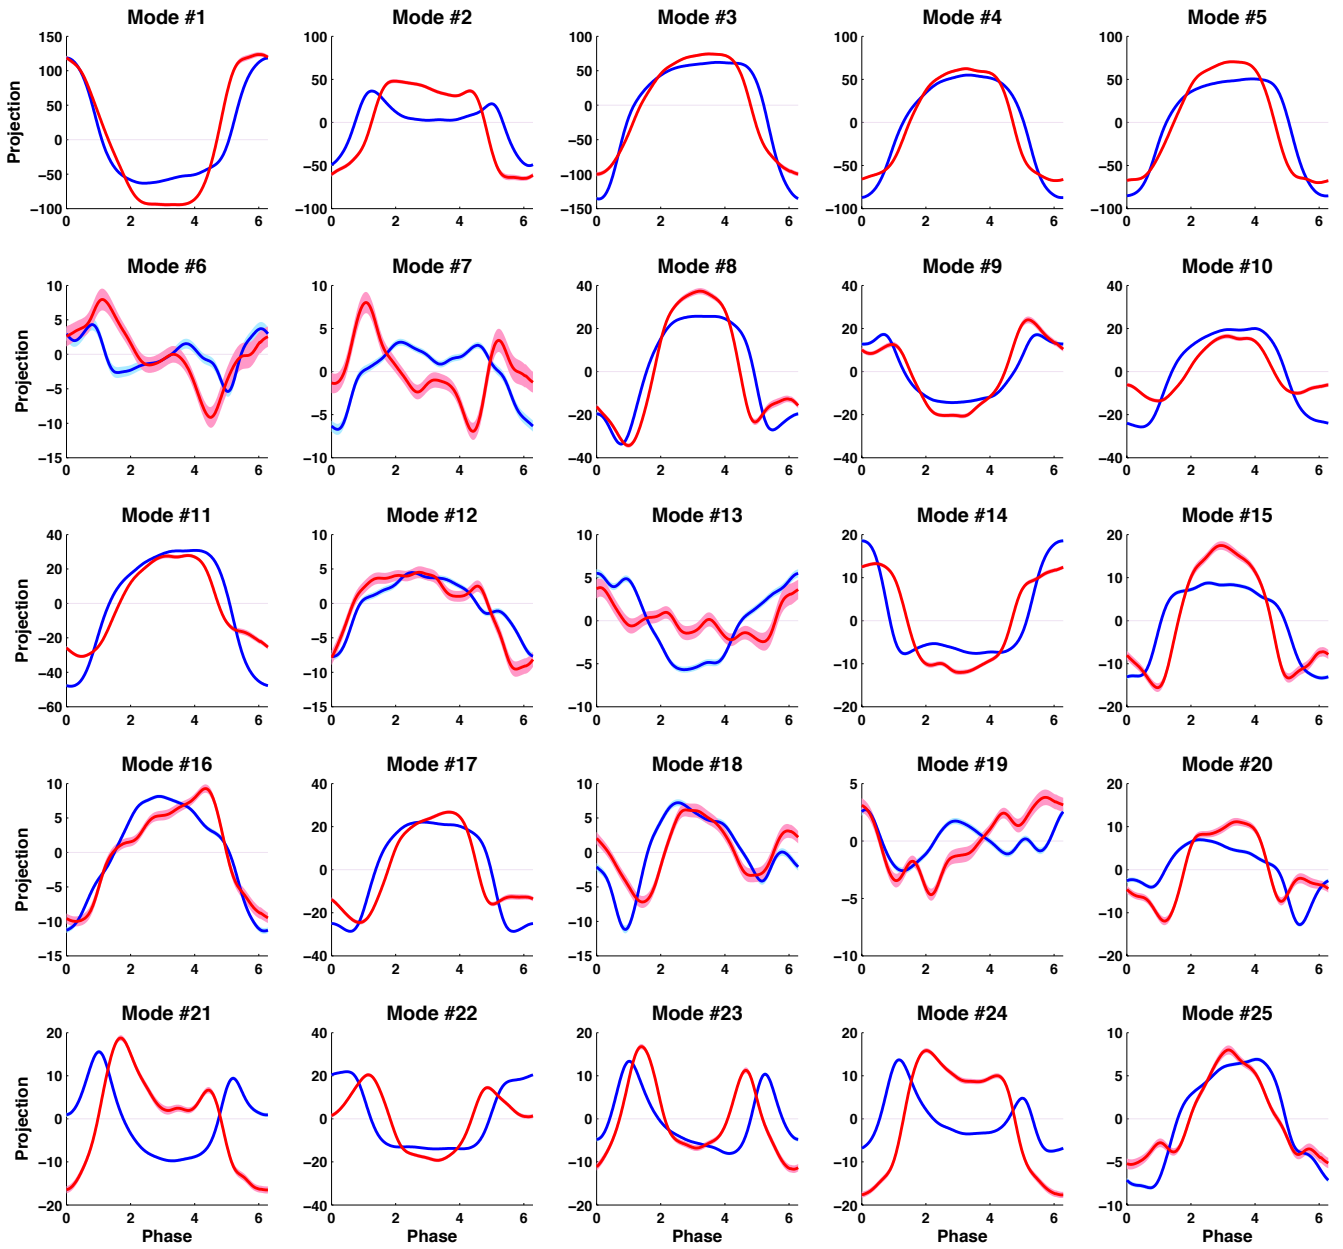

FIG. S6. Postural space periodic orbits for left wing grooming behaviours in Figure 11 in the main text. Blue curves are the average orbits for region (i), and red curves are average orbits for region (ii). Line thicknesses represent that standard error of the mean at each phase.



## SUPPLEMENTARY MOVIE LEGENDS

**Movie S1.** Raw video data of a behaving fly (left) and the corresponding segmented and aligned data (right).

**Movie S2.** Dynamics in behavioural space. Raw video of a behaving *D. melanogaster* (middle) is displayed alongside coordinates of the fly’s position within the filming apparatus (left) and its position in the embedded behavioural space (right). The red circles represent the positions in the appropriate coordinate system and the trailing lines are the positions traversed in the previous .5 s. The light blue shading indicates that a particular behaviour is being performed, and the blue text below the video of the fly gives a coarse label for the behaviour. The first portion of the movie is 5 s, played at real time (indicated by “Real Time” above the fly video), and the subsequent portion of the movie is slowed down by a factor of 5 for clarity (indicated by “Slowed 5×”).

**Movies S3-11.** Each movie is a mosaic of multiple instances of specific regions in behavioural space as displayed in Fig. 8 and Table S5. Every movie contains multiple segments from many different individuals and are slowed by a factor of 4 for clarity.

TABLE S5. Behavioural Movies

| Movie     | Label                       |
|-----------|-----------------------------|
| Movie S3  | Idle                        |
| Movie S4  | Right wing grooming         |
| Movie S5  | Left wing grooming          |
| Movie S6  | Left wing and legs grooming |
| Movie S7  | Wing waggle                 |
| Movie S8  | Abdomen grooming            |
| Movie S9  | Running                     |
| Movie S10 | Front leg grooming          |
| Movie S11 | Head grooming               |

**Movie S12.** Composite movie (slowed by a factor of 4) of randomly chosen instances of flies from the male-preferred behavioural region in Figure 11 of the main text.

**Movie S13.** Composite movie (slowed by a factor of 4) of randomly chosen instances of flies from the female-preferred behavioural region in Figure 11 of the main text.
